# Supplementary material for: Roles of Interleukin-1 Receptor Antagonist in Prostate Cancer Progression
Source: PubMed Central journal article supplement (PMC7763916; doi:10.3390/biomedicines8120602), 2020-12-13
Supplement: biomedicines-08-00602-s001.pdf [file biomedicines-08-00602-s001.pdf]

# Roles of interleukin-1 receptor antagonist in prostate cancer progression

Yu-Ching Fan, Kuan-Der Lee, Yuan-Chin Tsai

## Supplementary Figure S1

### Quantification of colonies in 3D culture approach.

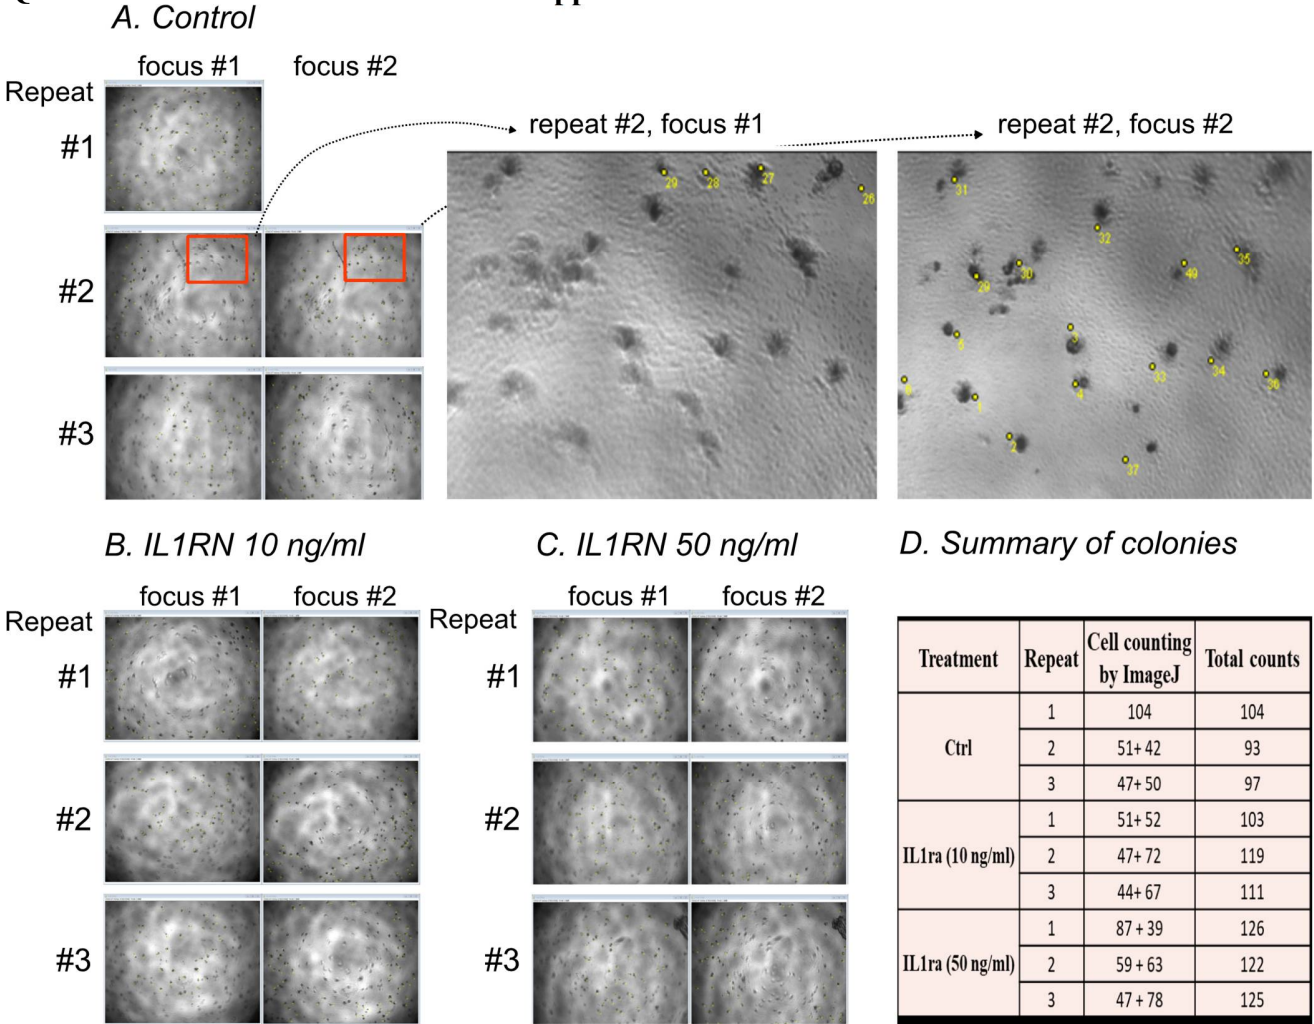

### Figure legend

(A-C) TRAMP-C1 cells were seeded on Matrigel-coated wells and treated with different concentration of IL1RN (control, panel A; 10 ng/ml, panel B; 50 ng/ml, panel C). Each condition was performed in triplicate (Repeat #1-#3). The images of technical repeats were taken with different focal planes and two selected images (focus #1, focus #2) were used for quantification. Colonies identified in the two focal planes were not overlapped (as demonstrated with the two red boxes) and then counted using Image J software. (D) The identified colonies in two focal planes were combined to derive the total counts in each repeat.

## Supplementary Figure S2

### Gene expression patterns in three prostate cancer databases.

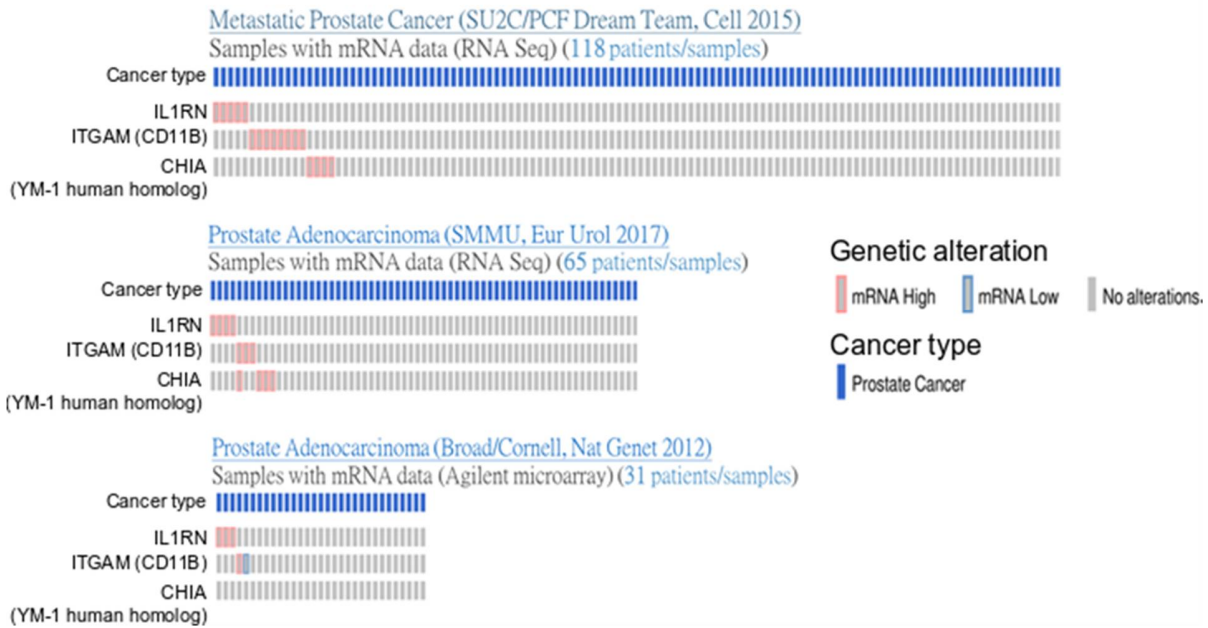

### Figure legend

A bar code plot for mRNA expression of IL1RN, ITGAM (CD11b), and CHIA (human homolog gene of mouse YM-1) in three different prostate cancer clinical databases were analyzed using the cBioPortal website.

### Supplementary Table S1. Primer sequences for the qRT-PCR.

| Gene    | 5'-3'                          |
|---------|--------------------------------|
| IL1RN F | CAG CTC ATT GCT GGG TAC TT     |
| IL1RN R | CTC AGA GCG GAT GAA GGT AAA G  |
| CXCL1 F | GTG TCT AGT TGG TAG GGC ATA AT |
| CXCL1 R | CAG TCC TTT GAA CGT CTC TGT    |
| CCL2 F  | AGT AGG CTG GAG AGC TAC AA     |
| CCL2 R  | GTA TGT CTG GAC CCA TTC CTT C  |
| GAPDH F | TCT CCC TCA CAA TTT CCA TCC    |
| GAPDH R | GGG TGC AGC GAA CTT TAT TG     |

**Supplementary Table S2.** Abbreviations used in the article

| <b>Abbreviation</b> | <b>Full name</b>                                                |
|---------------------|-----------------------------------------------------------------|
| ADT                 | Androgen-deprivation therapy                                    |
| AR                  | Androgen receptor                                               |
| BrdU                | Bromodeoxyurea                                                  |
| CCL2                | C-C motif chemokine ligand 2                                    |
| CRPC                | Castration-resistant prostate cancer                            |
| CD11b               | Cluster of differentiation 11b                                  |
| CHIA                | Acidic mammalian chitinase                                      |
| DHT                 | Dihydrotestosterone                                             |
| ELISA               | Enzyme-linked immunosorbent assay                               |
| IFN $\gamma$        | Interferon gamma                                                |
| IL1 $\alpha$        | Interleukin-1 alpha                                             |
| IL1 $\beta$         | Interleukin-1 beta                                              |
| IL1RAP              | Interleukin-1 receptor accessory protein                        |
| IL1RN               | Interleukin-1 receptor antagonist                               |
| IL1R1               | Interleukin-1 receptor type 1                                   |
| LLC1                | Lewis lung carcinoma                                            |
| LNCaP               | Lymph node carcinoma of the prostate                            |
| MDV                 | AR inhibitor MDV3100                                            |
| N-CoR               | Nuclear receptor corepressor 1                                  |
| RT-qPCR             | Reverse-transcription quantitative<br>polymerase chain reaction |
| TCGA                | The cancer genome atlas                                         |
| TILs                | Tumor-infiltrating leukocytes                                   |
| TME                 | Tumor microenvironment                                          |
| TNF $\alpha$        | Tumor necrosis factor alpha                                     |
| TRAMP-C1            | transgenic adenocarcinoma of the mouse<br>prostate cell line    |
